## Title Page

### Identifying the diamond in the rough: a study of allelic diversity underlying flowering time adaptation in maize landraces

Authors:

J. Alberto Romero-Navarro  
jar547@cornell.edu  
School of Integrative Plant Sciences  
Section of Plant Breeding and Genetics  
Cornell University  
Ithaca, NY, USA

Martha Wilcox  
M.Willcox@cgiar.org  
International Maize and Wheat Improvement Center (CIMMYT)  
Texcoco, Edo. de México, Mexico

Juan Burgueño  
J.Burgueno@cgiar.org  
International Maize and Wheat Improvement Center (CIMMYT)  
Texcoco, Edo. de México, Mexico

Cinta Romay  
mcr72@cornell.edu  
Institute for Genomic Diversity  
Ithaca, NY, USA

Kelly Swarts  
kls283@cornell.edu  
School of Integrative Plant Sciences  
Section of Plant Breeding and Genetics  
Cornell University  
Ithaca, NY, USA

Samuel Trachsel  
s.trachsel@cgiar.org  
International Maize and Wheat Improvement Center (CIMMYT)  
Texcoco, Edo. de México, Mexico

Ernesto Preciado  
preciado.ernesto@inifap.gob.mx

Instituto Nacional de Investigaciones Forestales Agrícolas y Pecuarias (INIFAP)  
Campo Experimental Bajío, Celaya, Guanajuato, Mexico

Arturo Terron  
terron.arturo@inifap.gob.mx  
Instituto Nacional de Investigaciones Forestales Agrícolas y Pecuarias (INIFAP)  
Campo Experimental Bajío, Celaya, Guanajuato, Mexico

Humberto Vallejo Delgado  
vallejo.humberto@inifap.gob.mx  
Instituto Nacional de Investigaciones Forestales Agrícolas y Pecuarias (INIFAP)  
Campo Experimental Uruapan, Uruapan, Michoacán, México

Victor Vidal  
vidal.victorantonio@inifap.gob.mx  
Instituto Nacional de Investigaciones Forestales Agrícolas y Pecuarias (INIFAP)  
Campo Experimental Santiago Ixcuintla, Santiago Ixcuintla, Nayarit, México

Alejandro Ortega  
ortega.alejandro@inifap.gob.mx  
Instituto Nacional de Investigaciones Forestales Agrícolas y Pecuarias (INIFAP)  
Campo Experimental Norman E. Borlaug, Ciudad Obregón, Sonora, Mexico

Armando Espinoza Banda  
rmando.espinoza@uaaan.mx  
Universidad Autónoma Agraria Antonio Narro  
Torreón, Coahuila, Mexico

Noel Orlando Gómez Montiel  
gomez.noel@inifap.gob.mx  
Instituto Nacional de Investigaciones Forestales Agrícolas y Pecuarias (INIFAP)  
Campo Experimental Iguala, Iguala, Guerrero, Mexico

Ivan Ortiz-Monasterio  
I.ORTIZ-MONASTERIO@cgiar.org  
International Maize and Wheat Improvement Center (CIMMYT)  
Texcoco, Edo. de México, Mexico

Félix San Vicente  
F.SanVicente@cgiar.org  
International Maize and Wheat Improvement Center (CIMMYT)  
Texcoco, Edo. de México, Mexico

Armando Guadarrama Espinoza  
AGuadarramaEspinoza@dow.com  
International Maize and Wheat Improvement Center (CIMMYT)  
Texcoco, Edo. de México, Mexico

Gary Atlin  
Gary.Atlin@gatesfoundation.org  
International Maize and Wheat Improvement Center (CIMMYT)  
Texcoco, Edo. de México, Mexico

Peter Wenzl  
peter.wenzl@croptrust.org  
International Maize and Wheat Improvement Center (CIMMYT)  
Texcoco, Edo. de México, Mexico

Sarah Hearne (corresponding author)  
S.Hearne@cgiar.org  
International Maize and Wheat Improvement Center (CIMMYT)  
Texcoco, Edo. de México, Mexico

Edward Buckler (corresponding author)  
esb33@cornell.edu  
US Department of Agriculture (USDA) - Agricultural Research Service (USDA-ARS)  
Institute for Genomic Diversity; Department of Plant Breeding and Genetics, Cornell University  
Ithaca, NY, USA

1 **Landraces (traditional varieties) of crop species are a reservoir of useful genetic**  
2 **diversity, yet remain untapped due to the genetic linkage between the few useful alleles**  
3 **with hundreds of undesirable alleles<sup>1</sup>. We integrated two approaches to characterize the**  
4 **genetic diversity of over 3000 maize landraces from across the Americas. First, we**  
5 **mapped the genomic regions controlling latitudinal and altitudinal adaptation, identifying**  
6 **1498 genes. Second, we developed and used F-One Association Mapping (FOAM) to**  
7 **directly map genes controlling flowering time across 22 environments, identifying 1,005**  
8 **genes. In total 65% of the SNPs associated with altitude were also associated with**  
9 **flowering time. In particular, we observed many of the significant SNPs were contained in**  
10 **large structural variants (inversions, centromeres, and pericentromeric regions): 29.4%**  
11 **for flowering time, 58.4% for altitude and 13.1% for latitude. The combined mapping**  
12 **results indicate that while floral regulatory network genes contribute substantially to field**  
13 **variation, over 90% of contributing genes likely have indirect effects. Our strategy can be**  
14 **used to harness the diversity of maize and other plant and animal species.**

15 Maize (*Zea mays* subsp. *mays*) is a model organism with a legacy of a hundred years of  
16 cytological, genetic, and biomolecular characterization<sup>2</sup>. Maize displays high levels of genetic  
17 diversity with low linkage disequilibrium (LD)<sup>3,4</sup>, low population differentiation<sup>5</sup>, prevalent  
18 migration<sup>6</sup> and occasional introgression from wild relatives<sup>7-9</sup>. More recently, experimental  
19 populations like the Nested Association Mapping (NAM) populations<sup>10,11</sup>, and large association  
20 panels<sup>4,12</sup> have allowed mapping and deployment of useful alleles for several quantitative  
21 traits<sup>13-16</sup>. However, most of the founder lines from these panels correspond to highly inbred  
22 improved lines, many from temperate regions, capturing only a modest fraction of the total  
23 diversity present in the species. In contrast, maize landraces span numerous ecogeographic  
24 areas and harbor most of the diversity of the species. Nevertheless, maize landraces like many  
25 other crops traditional varieties remain largely uncharacterized by genomics.

26 This study maps genes controlling flowering with two distinct methods: (1) Each of these  
27 landraces come from environments to which they are well adapted. We used this adaptation as  
28 the trait to identify genes driving large scale adaptation. (2) We mapped flowering time variation  
29 in controlled field experiments through a novel, rapid, experimental design called F-One  
30 Association Mapping (FOAM) (Figure 1). Briefly, FOAM consists of sampling single individuals  
31 across numerous populations, which are genotyped and crossed to one or a small number of  
32 common parents to derive F1 families. Subsequently GWAS is performed from multi-trial F1  
33 progeny evaluation. Major advantages for this design are (a) capturing thousands of alleles  
34 across populations, (b) maintaining the tractability of two alleles per loci per individual, (c) ample  
35 replication of alleles increasing the power and accuracy for genetic effect estimation. The main  
36 limitation of FOAM is that the nested evaluation of different subsets of F1 progeny by ecological  
37 zone limit the ability to accurately estimate genotype by environment interaction effects.

38 Our maize landrace FOAM population used individuals from 4,471 accessions from 35 countries  
39 in the Americas (Figure 2) grouped into three adaptation classes to account for altitude  
40 adaptation (low, middle and high elevation). Similarly, the common parents and evaluation sites  
41 were nested within adaptation class (methods, supplemental figure 1)<sup>17,18</sup>. Landrace parents  
42 were genotyped for close to one million SNPs using Genotyping by Sequencing<sup>19</sup>, and missing  
43 data was imputed using BEAGLE4<sup>20</sup>. Of the 4,471 accessions, 3,552 yielded F1 families  
44 containing both genotypic profiles and sufficient progeny, 3,633 contained detailed passport  
45 information which was used for mapping large scale adaptation, and 2,603 were present in both  
46 mapping studies.

47 We first explored the effects of recombination frequency and geography-driven limited dispersal  
48 on the distribution of genetic diversity in the landrace parents. Using Multidimensional Scaling  
49 (MDS, Methods), we observed the first axis and second axes explained only 6.1% and 1.7% of  
50 of the variance respectively, consistent with the low  $F_{ST}$  in maize landraces<sup>5</sup>. The first axis  
51 separates among Mexican landraces, consistent with Mexican landraces having a deeper  
52 coalescent and greater representation in the panel. The second axis was associated to a  
53 latitudinal North to South gradient across Latin America representing isolation by distance  
54 (Supplemental Figure 2). In addition, a Mantel test<sup>21</sup> revealed a significant correlation between  
55 geographic and genetic distances (Pearson's  $r = 0.46$ ,  $P$ -value < 0.001), with most of the  
56 association driven by altitude. Despite this, phylogenetic analysis (Methods, Supplemental  
57 Figure 3) revealed that adaptation class does not drive clade membership, which indicates that

58 alleles segregate across adaptation classes, with highland adaptation being polyphyletic,  
59 consistent with recent reports<sup>22</sup>. To study recombination, we estimated an approximate LD  
60 statistic (Methods) which shows a distribution consistent with previous recombination  
61 estimates<sup>23,24</sup>, with higher recombination in gene-rich regions, and lower around centromeres.  
62 Each chromosome displayed a unique recombination landscape, with the presence of half a  
63 dozen high LD regions (Supplemental figure 4), which together encompassed 6.1% of the base  
64 pairs of genome, accounting for 2.8% of the annotated coding genes. Together, these results  
65 suggest that although at large scale geography and adaptation contribute to the distribution of  
66 diversity, even with the large effective population size of landraces at the genomic scale a  
67 complex recombination landscape limits the free segregation of alleles through increased LD.

68 Flowering time generally plays a crucial role in local adaptation of plants, and in maize flowering  
69 time is a complex trait controlled by hundreds of small effect loci, many with rich allelic series  
70 <sup>4,14,25–30</sup>. We used altitude and latitude from sampling location as traits for mapping local  
71 adaptation, and the significance thresholds were chosen to maximize genic overlap rate  
72 between flowering, altitude, and latitude (Methods, supplemental figure 5). For altitude, we  
73 observed 58.4% of the significant SNPs corresponded to regions with higher LD. In particular,  
74 INV4m, the 13Mb adaptive introgression from highland teosinte into maize<sup>8,31</sup> was highly  
75 significant. We also observed significance for the centromeres of chromosomes 2,5,6,8 and a  
76 large region upstream of the centromere on chromosome 3. Outside this low recombination  
77 regions, 366 genes showed significant association with altitude. For Latitude, we observed  
78 13.1% of the significant markers were contained within low recombination regions, particularly  
79 the centromere of chromosomes 5. In total across all Latin America, 1498 genes showed  
80 significant association with latitude, of which 395 of were shared with altitude. The minor allele  
81 frequency distribution of the significant alleles indicated that many are shared across clades and  
82 landraces, which was very distinct from the neutral distribution (Figure 3). These 1498 genes  
83 appear to be the main contributor to large scale environmental adaptation to altitude and latitude  
84 – the key drivers of flowering time.

85 To study the genetic basis of flowering time, we conducted field evaluation on F1 progeny  
86 across 22 trials and 2 years in 13 locations across Mexico, with each trial containing a different  
87 subset of the collection to maximize number of accessions evaluated (Methods, supplemental  
88 table 1). Phenotypic data was analyzed independently for each trial using a mixed linear  
89 (Methods), yielding 18,797 accession parent-environment estimates for each male and female

90 flowering time. We performed genome wide association for days to male and female flowering  
91 using a mixed linear model (Methods). In total 72% of the associated SNPs were significant for  
92 both male and female flowering, as expected from the overlapping genetic control<sup>14</sup>. There was  
93 a significant contribution of low recombination regions in flowering time variation, parallel to that  
94 of latitude and longitude, with a 20-fold enrichment for significant SNPs at high LD regions  
95 (Pearson's chi-squared, p-value < 2.2e-16). In particular, significant variants included the  
96 centromeres of chromosomes 3, 5, and 6, INV4m, and a 6Mb region on chromosome 3  
97 beginning at 79Mb. The 6Mb region on chromosome 3 has a segregation similar to INV4, and  
98 together with its increased LD suggests it might be an inversion. In NAM this putative inversion  
99 and the centromere comprise a single QTL for flowering time<sup>14</sup>. For the centromere of  
100 chromosome 5 there were 3 distinctive alleles segregating in the landraces, all present in the  
101 NAM population (supplemental figure 6). The inverted allele of INV4m, although absent in  
102 temperate material, segregates at high frequency in highland landraces (supplemental figure 7),  
103 where it has very large additive effect advancing flowering by three days, the largest effect for  
104 flowering time in maize to date. Both homozygous alleles from the putative inversion on  
105 chromosome 3 segregate across our maize landrace panel and the NAM population. Compared  
106 to INV4m, this locus displays a more modest effect on flowering time. The heterotic effect of the  
107 centromere of chromosome 5 on yield<sup>32</sup>, potentially product the complementation of deleterious  
108 mutations<sup>23</sup>, suggests that the significant inversions and centromeres may similarly affect  
109 flowering time through heterotic effects leading to more vigorous plants, which in maize  
110 generally results in earlier flowering.

111 Outside the structural variants, we observed 881 and 883 genes (around 2.2% of genes) with  
112 significant association for days to female and days to male flowering respectively (Supplemental  
113 Tables, Figure 4). To further characterize the regions associated with flowering time, we looked  
114 for gene ontology enrichment and gene expression using the maize transcription  
115 atlas<sup>33</sup>(Methods), and compared the significant genes to a candidate gene list containing genes  
116 characterized in other populations, known to interact in the maize flowering time regulatory  
117 network<sup>34</sup> as well as the 25 members of the *Zea mays* CENTRORADIALIS (ZCN) gene family<sup>35</sup>.  
118 Overall the associating genes tended to be expressed in anthers, and enriched in general  
119 metabolic processes, with the genes known to be part of the regulatory network being more  
120 expressed in immature cob and the tip of the leaf at V5 stage and enriched for regulatory  
121 processes (Supplemental figure 8). We observed a significant enrichment in flowering time

122 candidate genes compared to the rest of the genome (Fisher's Exact Test p-value =  $4.3 \times 10^{-7}$ ).  
123 In total 10 and 12 candidate genes representing the circadian clock, photoperiod, gibberellin  
124 acid, and circadian clock pathways displayed significant associations with male and female  
125 flowering respectively. Out of these, nine were common for both types of flowering. The most  
126 significant hits corresponded to VGT1<sup>36,37</sup>, one of the largest known G×E QTL, and ZCN8<sup>35,38</sup>,  
127 the maize florigen and homolog to *FT* in *Arabidopsis* (Figure 5). ZmCCT, the largest  
128 photoperiod QTL<sup>29</sup> was only modestly significant for latitude, and significant only for days to  
129 female flowering, probably a result of non-inducing sampling and trial locations. In particular for  
130 the gene *d8*, a locus with cryptic association with flowering time<sup>34</sup>, we observed significance for  
131 this gene around 50 and 100kb up and downstream the coding region for latitude, altitude, and  
132 both male and female flowering, overlapping with the region previously observed to display  
133 divergent selection associated with climate adaptation<sup>39</sup>. In addition, the distribution of the  
134 flowering time associating genes displayed a significant geography effect, with 56 and 52 genes  
135 in common with altitude and latitude respectively. In general, the minor alleles for flowering time  
136 tended to be associated with high elevation, and northwest coordinates, however the minor  
137 allele frequency distribution of the significant SNPs was different to that of the alleles significant  
138 for altitude and latitude, having a significant shift towards low frequency polymorphisms (Figure  
139 3). Together, these results support the model of infrequent variants in recurrent regulatory  
140 genes underlying the genetic control of flowering time variation in maize, with adaptive alleles  
141 segregating across populations, and their distribution matching the fitness optimum according to  
142 geographic variation. In particular, the high overlap between significant SNPs for altitude and  
143 flowering time suggests that for tropical maize flowering time adaptation is very relevant for  
144 changes in elevation, which affects among others spectral composition and intensity of incident  
145 light, as well as the incidence of heat and cold stress. In contrast, the lower overlap between  
146 latitudinal and flowering time associating SNPs could be to the sampling from non-photoperiod-  
147 inducing latitudes, potentially leading to latitudinal flowering time adaptation being relevant for  
148 other biotic (disease pressure) and abiotic (soil pH, precipitation) stresses.

149 We assayed the potential for predicting flowering time in the landraces using either all our high  
150 density genetic markers or just the markers significantly associated with the trait. We performed  
151 genome wide prediction using gBLUP independently for each trial (Methods). The average 5-  
152 fold cross-validated prediction accuracy was 0.45 across trials for both male and female  
153 flowering time and, and as high as 0.7 for some trials (Supplemental figure 9). Genomic



154 prediction accuracy between the top genes from GWAS was equivalent to that of 30,000  
155 random evenly distributed SNPs, highlighting their potential use for breeding of the significant  
156 markers. Intriguingly prediction accuracy was not correlated with our other heritability estimate  
157 (Pearson  $cor=0.22$ ), which could be an effect of the differences in the genetic variances and  
158 sample sizes across all trials. Together the good predictive ability of the significant regions for  
159 genomic selection shows the potential to greatly speed the breeding of new adapted varieties  
160 with exotic beneficial alleles.

161 Crop landraces are an incredible source of diversity that will be necessary to adapt our crops to  
162 next century of climate change. However, their tremendous diversity and genetic load prevent  
163 them from being efficiently tapped without a genomic index. This research lays out two  
164 complementary strategies for tapping this diversity. The geographic associations are powerfully  
165 identifying the adaptive loci, which appear to be common and shared, and are unlikely to be  
166 deleterious given their high frequency. This extensive sharing is probably the result of  
167 outcrossing and extensive migration throughout Latin America in last several millennia. The  
168 limitation of this approach is that correlated traits and adaptations are being co-mapped. The  
169 novel FOAM field trial associations, while substantially overlapping, are showing the impacts of  
170 deleterious and private mutations and their complementation in these hybrid trials. These  
171 deleterious alleles have been the bane of breeders wanting to tap landrace diversity. The  
172 strategy for tapping this diversity should be use the overlapping genes and alleles of the two  
173 separate approaches— as these have proven to be adaptive *and* target the trait of interest. The  
174 breeding could use standard genomic selection or genome editing. This provides an efficient  
175 strategy to tap landraces diversity and allow our crops to adapt to faster changes than ever had  
176 in the past.

## Methods

### Mating design and phenotypic evaluation

The mating design for the maize landrace FOAM population consisted of crossing each accession male to single cross hybrid females of matching adaptation. Leaf tissue of the landrace individual was collected for genotyping. The progeny evaluation trials were performed across 2 years in 13 locations across Mexico using an augmented row-column design, which includes systematic checks in field rows and columns<sup>40</sup>. There were between 288 and 1928 accessions per trial, with an average of 834 (Supplemental table 1). Over half of the accessions were replicated in 5 or more trials, with a maximum value of 13 trials per accession and a minimum of 1. For each trial, each experimental row contained between 10 and 25 progeny plants. The replication across trials together with the use of systematic checks across experimental fields provides sufficient allelic replication for accurate estimation of genetic effects. Flowering time was measured in each trial following the maize standard, i.e. the number of days from planting until half of the individuals within a plot displayed silks for female flowering or anthers in half of the central spike for male flowering.

### Genotyping

Accessions used as male parents were genotyped using GBS<sup>19</sup>, with ApeKI as the restriction enzyme to a replication level of ~96 individuals per sequencing plate. Approximately  $8 \times 10^9$  sequencing reads were generated using an Illumina HiSeq for the landrace accessions and sequence reads were analyzed jointly with another 40,000 maize lines as part of the GBS Build 2.7 using TASSEL<sup>41</sup>. For association analyses, missing data was imputed using BEAGLE<sup>20</sup>, which has been shown to yield the best current accuracies in maize heterozygous material ( $R^2=0.68$ )<sup>42</sup>. After imputation, SNPs were filtered for minor allele frequency greater than 1%

resulting in approximately 500,000 biallelic markers across the genome. GBS non-imputed markers can be accessed at <http://hdl.handle.net/11529/10034> and imputed GBS markers at <http://hdl.handle.net/11529/10035>

## Diversity Assessment

For the Mantel test<sup>21</sup>, we calculated the pairwise Euclidean distance matrix based on the geographical data from the accessions (latitude, longitude, and altitude, <http://mgb.cimmyt.org/gringlobal/search.aspx>). The genetic distance matrix was estimated from a genome wide random sample 30,000 non-imputed markers using TASSEL. The distance matrix was used for estimating the Neighbor-Joining tree using TASSEL. Multidimensional Scaling (MDS) was performed on the genetic distance matrix using the `cmds` function in R.

## Recombination

Our LD statistic consisted in estimating the correlation between markers across the genome at 100 site windows using all homozygote and heterozygote non-imputed markers with the LD function on the software TASSEL. For comparing the LD and recombination values, we estimated the correlation at 1Mb sliding windows between (1) the log<sub>10</sub> median LD estimate (2) the log median crossover probabilities estimated using the American and Chinese Nested Association Mapping populations<sup>23</sup>, and (3) the log median population recombination rates ( $\rho$ ) estimated both for improved lines and landraces Hapmap2 project<sup>24</sup>. Our LD estimates displayed a negative correlation with gene density ( $r=-0.57$ ) and NAM crossover probability<sup>23</sup> ( $r=-0.45$ ). We observed a modest negative correlation ( $r=-0.33$ ) with a population genetic estimate of historical recombination ( $\rho$ )<sup>23,24</sup>. High-LD regions were defined based on the change in slope of global median LD (Figure 5- Figure supplement 1) as those segments that

had a median LD greater than 0.01. In total, there were 256 high LD regions encompassing 7.8% of the genome.

### **Genome wide association with altitude and latitude**

We performed Genome Wide Association using a generalized linear model with altitude and latitude as response variables and markers filtered at 1% frequency as explanatory variables. Altitude and Latitude were recorded during field sampling of the original accessions. In order to establish a significance threshold to avoid excess of false positives, we estimated the overlap rate using the most significant flowering time GWAS SNPs. Overlap Rate was defined as the set of overlapping SNPs between the top flowering time SNPs and either altitude or latitude, divided by the union of the sets across significance thresholds from 0.001 to 0.01. Significance thresholds chosen were 0.005 for altitude and 0.01 for altitude (Supplemental figure 4). Heritability estimates were 0.88 for altitude and 0.85 for latitude, estimated LDK<sup>43</sup> with a single Kinship matrix, estimated with all the Beagle4 imputed markers, and the matrix was estimated from the algorithm implemented in GCTA<sup>44</sup>.

### **Analyses of structural variants**

In order to infer the underlying haplotypes for the centromeres of chromosomes 3,5,6, as well as INV4 and the high-LD region on chromosome 3, we first estimated a genetic distance matrix for each locus using the non-imputed markers. The distance matrices were then analysed using multidimensional scaling. The centromere of chromosome 5 segregates in the landraces with three distinct homozygous haplotypes and their corresponding heterozygote pairs. The region around the centromere of chromosome 6 was 12 Mb in size, includes the centromere and a large pericentromeric region that expands out in both directions; it displayed a similar pattern to the centromere of chromosome 5 however distinct alleles were not called due to the excess of

heterozygous individuals between the homozygous classes, probably reflecting recombinant haplotypes. The centromere of chromosome 3 displayed a more complex pattern of distance than the other two associating centromeres, likely due to the presence of more than three segregating haplotypes. For INV4, we observe two distinct alleles and the heterozygote. We observed the allele is fixed in many of CIMMYT improved lines (Table 3), including those used as parents for the highland test crosses in the present experiment.

### **Analysis of phenotypic data**

To estimate the breeding values of the landrace accession parent, for each trial a mixed linear model was fitted using restricted maximum likelihood method, in ASREML (V 3.0), using the progeny's calendar days to male or female flowering as a response variable. Of the 23 trials planted, one was excluded because flowering time data was not collected according to protocol. The models included fixed effects for checks, tester, and hybrid and a random effect of accession in a complete nested model. Including in the model the random effect of row and column and using an autoregressive model of order 1 in row and columns controlled experimental noise product of field variation. All the random effects were considered independent one from each other. The model used can be expressed as follows:

$$y_{ijklm} = \mu + \gamma_i + \lambda_j + \alpha_k + \beta_{l(k)} + \delta_{m(kl)} + \varepsilon_{ij}$$

where

$y_{ijklm}$ : is the response variable,

$\mu$ : is the overall mean,

$\gamma_i$ : is the effect of the  $i$ -th row,  $\gamma_i \sim N(0, \sigma_1^2)$

$\lambda_j$ : is the effect of the  $j$ -th column,  $\lambda_j \sim N(0, \sigma_2^2)$

$\alpha_k$ : is the effect of the  $k$ -th group,  $k=1, \dots, K, K+1$ , if  $k \leq K$  the group is a check, the group  $K+1$  is the average of testers.

$\beta_{l(k)}$ : is the effect of the  $l$ -th tester in group  $K+1$

$\delta_{m(kl)}$ : is the effect of the  $m$ -th accession in the tester  $k$  in group  $K+1$ ,  $\delta_{m(kl)} \sim N(0, \sigma_{kl}^2)$

$\varepsilon_{ij}$ : is the experimental error

for the experimental error we assume the following distribution:

$\varepsilon \sim N(0, \Sigma)$ , with  $\Sigma = \Sigma_r \otimes \Sigma_c$  and

$$\Sigma_r = \begin{bmatrix} 1 & \rho_r^1 & \rho_r^2 & \cdots & \rho_r^{d-2} & \rho_r^{d-1} \\ \rho_r^1 & 1 & \rho_r^1 & \cdots & \rho_r^{d-3} & \rho_r^{d-2} \\ \rho_r^2 & \rho_r^1 & 1 & \cdots & \vdots & \vdots \\ \vdots & \vdots & \vdots & \ddots & \vdots & \vdots \\ \rho_r^{d-2} & \rho_r^{d-3} & \rho_r^{d-4} & \cdots & 1 & \rho_r^1 \\ \rho_r^{d-1} & \rho_r^{d-2} & \rho_r^{d-3} & \cdots & \rho_r^1 & 1 \end{bmatrix} \quad \Sigma_c = \begin{bmatrix} 1 & \rho_c^1 & \rho_c^2 & \cdots & \rho_c^{d-2} & \rho_c^{d-1} \\ \rho_c^1 & 1 & \rho_c^1 & \cdots & \rho_c^{d-3} & \rho_c^{d-2} \\ \rho_c^2 & \rho_c^1 & 1 & \cdots & \vdots & \vdots \\ \vdots & \vdots & \vdots & \ddots & \vdots & \vdots \\ \rho_c^{d-2} & \rho_c^{d-3} & \rho_c^{d-4} & \cdots & 1 & \rho_c^1 \\ \rho_c^{d-1} & \rho_c^{d-2} & \rho_c^{d-3} & \cdots & \rho_c^1 & 1 \end{bmatrix}$$

## Genome wide association with flowering time

Association analysis was performed in two steps for all trials using a linear mixed model. For each trait (days to male and female flowering) two models were fitted, one with the trait BLUPs as response variable and another one with the standardized values of the same BLUPs. This was done in the absence of growing degree units, to verify the consistency of the results given the uneven variances for the trait across the various trials. The first step models included the fixed effects for trial (categorical); population structure in the form of 10 MDS weights

(numerical) that together explained around 13% of the genetic and 10.6% of the phenotypic variances; and the effect of the hybrid used as parent for each accession's cross. The random effect of relatedness was added to both models in the form of a kinship matrix. The kinship matrix was estimated using the same subset of SNPs as the MDS weights. The mixed model was fit using the R package EMMREML (<http://cran.r-project.org/web/packages/EMMREML/index.html>). Residuals were obtained from those models and fitted in the second step models as a response variable for the single marker analysis using R, with marker nested within trial.

The model equation used was

$$Y_{ijk} = \mu + T_i + H_{ij} + Q_{ijk} + K + \varepsilon_{ijk}$$

where

$y_{ijk}$ : is the response variable,

$\mu$ : is the overall mean,

$T_i$ : is the effect of the  $i$ -th trial

$H_j$ : is the effect of the hybrid parent

$Q_k$ : is the population structure effect containing 10 weights from MDS

$K$ : is the random effect of relatedness through kinship matrix  $K$  estimated from 30,000 random SNPS

$\varepsilon_{ijk}$ : is the residual error

In the second step of the association model, the residuals from the first model were fitted as a response variable in the following model

$$Y_i = S[t] + \varepsilon_i$$

Where  $Y$  is the residual,  $S$  is the SNP effect and is nested within trial  $t$ . The model tests the null hypothesis that the effect of each SNP is 0 in all trials.

$$H_0 : S = 0$$

The alternative hypothesis is that the SNP has an effect on any trial. The reason for testing this hypothesis is that the effect of each SNP can, and often does, change on value and direction depending on its segregation on the population and its phase with the causal polymorphism. We consider as significant the top one percent of the SNPs based on p-value, which all had  $-\log_{10}$  p-values greater than 18.

#### **Code availability**

R implementation of the ASREML code used for estimation of breeding values can be found at <http://data.cimmyt.org/dvn/dv/cimmytswdvn;jsessionid=c1de29cab7c37b41098fd8ad6684>

The mixed model was fit using the R package EMMREML (<http://cran.rproject.org/web/packages/EMMREML/index.html>)

All other additional scripts are available through github user [jar547@cornell.edu](mailto:jar547@cornell.edu)

#### **Significance at genic regions**

We reasoned that significance at candidate genes would depend on local LD and genotype coverage, therefore a higher proportion of significant SNPs around candidate genes would be indicative of association at the gene itself rather than at the entire LD block or because of higher genotype coverage. On that account, we looked at significant associating SNPs within 50 kb up and downstream of candidate genes. Of all the candidate genes, only PhyB1, GL15 and ZCN13 are in the high-LD set and therefore were excluded from this analysis.



Genome wide prediction was performed with using the software GAPIT<sup>43</sup>. The models were run for each trial, and accuracy was measured from performing 5 fold cross validation in 10 replicates for each trial. Two models were run for each trait/trial. One model used a kinship matrix estimated 1 SNP for each of the associated genomic regions, while the other used 30,000 random SNPs for the estimation of the kinship matrix. All models included 10 MDS weights to account for population structure.

### **Expression across tissues**

We used the transcription data from the maize atlas<sup>33</sup> for the following 11 tissues: 16 days after pollination embryo, 16 days after pollination endosperm, 6 days after silking primary root, tip of stage 2 leaf at V5 plant stage, base of stage 2 leaf at V5 plant stage, 13th leaf at V9 stage, 13th leaf at R2 stage , silk, anthers, Immature cob at V18 stage, 4th internode at V9 stage, and stem and shoot apical meristem at V4 stage. We used the standardized expression values, and estimated for each gene what tissue it was most expressed at. We then performed a chi-squared test for each tissue to test if there were more genes expressed at the candidate or associating genes than expected under the null model of equal levels of the global expression pattern.

### **Acknowledgments**

This work was supported by SAGARPA (La Secretaría de Agricultura, Ganadería, Desarrollo Rural, Pesca y Alimentación), Mexico under the MasAgro (Sustainable Modernization of Traditional Agriculture) initiative, the NSF Grants #1238014 and #0922493, and the USDA-ARS. We would like to thank ICAMEX, BIDASem, and Dupont-Pioneer for assistance establishing phenotypic evaluation trials.

## References

1. Warburton, M. L. *et al.* Genetic Diversity in CIMMYT Nontemperate Maize Germplasm: Landraces, Open Pollinated Varieties, and Inbred Lines. *Crop Sci.* **48**, 617 (2008).
2. Wallace, J. G., Larsson, S. J. & Buckler, E. S. Entering the second century of maize quantitative genetics. *Heredity* **112**, 30–38 (2014).
3. Remington, D. L. *et al.* Structure of linkage disequilibrium and phenotypic associations in the maize genome. *Proc. Natl. Acad. Sci. U. S. A.* **98**, 11479–11484 (2001).
4. Romay, M. C. *et al.* Comprehensive genotyping of the USA national maize inbred seed bank. *Genome Biol.* **14**, R55 (2013).
5. Hufford, M. B. *et al.* Comparative population genomics of maize domestication and improvement. *Nat. Genet.* **44**, 808–811 (2012).
6. Mir, C. *et al.* Out of America: tracing the genetic footprints of the global diffusion of maize. *Theor. Appl. Genet.* **126**, 2671–2682 (2013).
7. van Heerwaarden, J. *et al.* Genetic signals of origin, spread, and introgression in a large sample of maize landraces. *Proc. Natl. Acad. Sci. U. S. A.* **108**, 1088–1092 (2011).
8. Hufford, M. B. *et al.* The genomic signature of crop-wild introgression in maize. *PLoS Genet.* **9**, e1003477 (2013).
9. Warburton, M. L. *et al.* Gene flow among different teosinte taxa and into the domesticated maize gene pool. *Genet. Resour. Crop Evol.* **58**, 1243–1261 (2011).
10. McMullen, M. D. *et al.* Genetic properties of the maize nested association mapping population. *Science* **325**, 737–740 (2009).
11. Li, C. *et al.* Quantitative trait loci mapping for yield components and kernel-related traits in multiple connected RIL populations in maize. *Euphytica* **193**, 303–316 (2013).
12. Flint-Garcia, S. A. *et al.* Maize association population: a high-resolution platform for

- quantitative trait locus dissection. *Plant J.* **44**, 1054–1064 (2005).
13. Peiffer, J. A. *et al.* The genetic architecture of maize height. *Genetics* **196**, 1337–1356 (2014).
  14. Buckler, E. S. *et al.* The genetic architecture of maize flowering time. *Science* **325**, 714–718 (2009).
  15. Harjes, C. E. *et al.* Natural genetic variation in lycopene epsilon cyclase tapped for maize biofortification. *Science* **319**, 330–333 (2008).
  16. Tian, F. *et al.* Genome-wide association study of leaf architecture in the maize nested association mapping population. *Nat. Genet.* **43**, 159–162 (2011).
  17. Salhuana, W., Jones, Q. & Sevilla, R. The Latin American Maize Project: Model for rescue and use of irreplaceable germplasm. *Diversity* (1991).
  18. Pollak, L. M. The history and success of the public-private project on germplasm enhancement of maize (GEM). *Adv. Agron.* (2003).
  19. Elshire, R. J. *et al.* A Robust, Simple Genotyping-by-Sequencing (GBS) Approach for High Diversity Species. *PLoS One* **6**, e19379 (2011).
  20. Browning, B. L. & Browning, S. R. Improving the accuracy and efficiency of identity-by-descent detection in population data. *Genetics* **194**, 459–471 (2013).
  21. Mantel, N. The detection of disease clustering and a generalized regression approach. *Cancer Res.* **27**, 209–220 (1967).
  22. Takuno, S. *et al.* Independent molecular basis of convergent highland adaptation in maize. *bioRxiv* (2015). doi:10.1101/013607
  23. Rodgers-Melnick, E. *et al.* Recombination in diverse maize is stable, predictable, and associated with genetic load. *Proc. Natl. Acad. Sci. U. S. A.* **112**, 3823–3828 (2015).
  24. Chia, J.-M. *et al.* Maize HapMap2 identifies extant variation from a genome in flux. *Nat. Genet.* **44**, 803–807 (2012).

25. Bertin, P., Madur, D., Combes, V., Dumas, F. & Brunel, D. Adaptation of Maize to Temperate Climates: Mid-Density Genome-Wide Association Genetics and Diversity Patterns Reveal Key Genomic Regions, with a .... *PLoS One* (2013).
26. Ducrocq, S. *et al.* Key impact of Vgt1 on flowering time adaptation in maize: evidence from association mapping and ecogeographical information. *Genetics* **178**, 2433–2437 (2008).
27. Hirsch, C. N. *et al.* Insights into the maize pan-genome and pan-transcriptome. *Plant Cell* **26**, 121–135 (2014).
28. Chardon, F. *et al.* Genetic architecture of flowering time in maize as inferred from quantitative trait loci meta-analysis and synteny conservation with the rice genome. *Genetics* **168**, 2169–2185 (2004).
29. Hung, H.-Y. *et al.* ZmCCT and the genetic basis of day-length adaptation underlying the postdomestication spread of maize. *Proc. Natl. Acad. Sci. U. S. A.* **109**, E1913–21 (2012).
30. Salvi, S. *et al.* Conserved noncoding genomic sequences associated with a flowering-time quantitative trait locus in maize. *Proc. Natl. Acad. Sci. U. S. A.* **104**, 11376–11381 (2007).
31. Pyhäjärvi, T., Hufford, M. B., Mezouk, S. & Ross-Ibarra, J. Complex patterns of local adaptation in teosinte. *Genome Biol. Evol.* **5**, 1594–1609 (2013).
32. Stuber, C. W., Lincoln, S. E., Wolff, D. W., Helentjaris, T. & Lander, E. S. Identification of genetic factors contributing to heterosis in a hybrid from two elite maize inbred lines using molecular markers. *Genetics* **132**, 823–839 (1992).
33. Sekhon, R. S. *et al.* Genome-wide atlas of transcription during maize development. *Plant J.* **66**, 553–563 (2011).
34. Dong, Z. *et al.* A gene regulatory network model for floral transition of the shoot apex in maize and its dynamic modeling. *PLoS One* **7**, e43450 (2012).
35. Danilevskaya, O. N., Meng, X., Hou, Z., Ananiev, E. V. & Simmons, C. R. A genomic and expression compendium of the expanded PEBP gene family from maize. *Plant Physiol.*

- 146**, 250–264 (2008).
36. Salvi, S. *et al.* Conserved noncoding genomic sequences associated with a flowering-time quantitative trait locus in maize. *Proc. Natl. Acad. Sci. U. S. A.* **104**, 11376–11381 (2007).
  37. Castelletti, S., Tuberosa, R., Pindo, M. & Salvi, S. A MITE transposon insertion is associated with differential methylation at the maize flowering time QTL Vgt1. *G3* **4**, 805–812 (2014).
  38. Meng, X., Muszynski, M. G. & Danilevskaya, O. N. The FT-like ZCN8 Gene Functions as a Floral Activator and Is Involved in Photoperiod Sensitivity in Maize. *Plant Cell* **23**, 942–960 (2011).
  39. Camus-Kulandaivelu, L. *et al.* Patterns of molecular evolution associated with two selective sweeps in the Tb1-Dwarf8 region in maize. *Genetics* **180**, 1107–1121 (2008).
  40. Crossa, J. & Federer †, W. T. I.4 Screening Experimental Designs for Quantitative Trait Loci, Association Mapping, Genotype-by Environment Interaction, and Other Investigations. *Front. Physiol.* **3**, (2012).
  41. Glaubitz, J. C. *et al.* TASSEL-GBS: a high capacity genotyping by sequencing analysis pipeline. *PLoS One* **9**, e90346 (2014).
  42. Swarts, K., Li, H., Romero Navarro, J. A. & An, D. Novel Methods to Optimize Genotypic Imputation for Low-Coverage, Next-Generation Sequence Data in Crop Plants. *The Plant* **7**, (2014).
  43. Speed, D. & Balding, D. J. MultiBLUP: improved SNP-based prediction for complex traits. *Genome Res.* **24**, 1550–1557 (2014).
  44. Yang, J., Lee, S. H., Goddard, M. E. & Visscher, P. M. GCTA: a tool for genome-wide complex trait analysis. *Am. J. Hum. Genet.* **88**, 76–82 (2011).
  45. Lipka, A. E. *et al.* GAPIT: genome association and prediction integrated tool. *Bioinformatics* **28**, 2397–2399 (2012).

## Figures

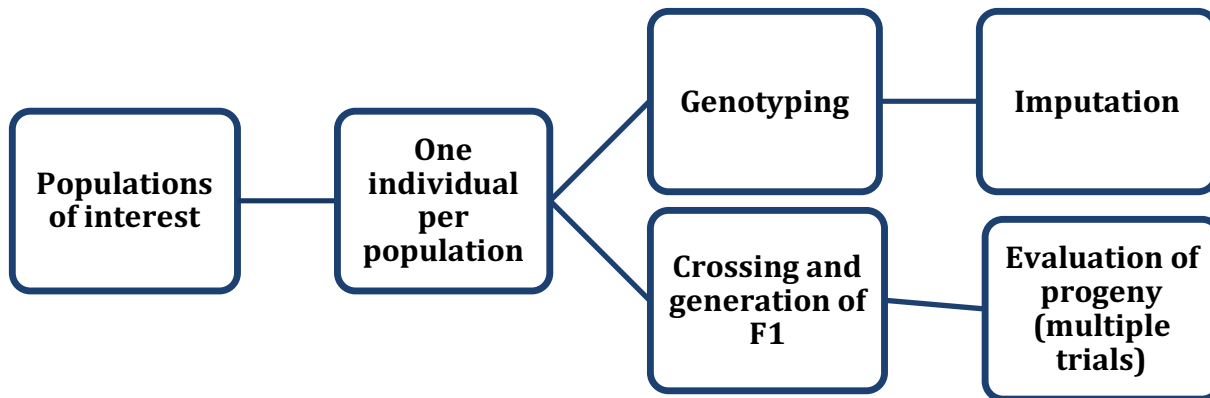

Figure 1. Experimental design. One individual from each of up to thousands of individuals is genotyped and used as parent. Progeny are then evaluated for multiple years/locations to estimate the genetic contribution of the original individual and phenotypic and genotypic data are used for Genome Wide Association

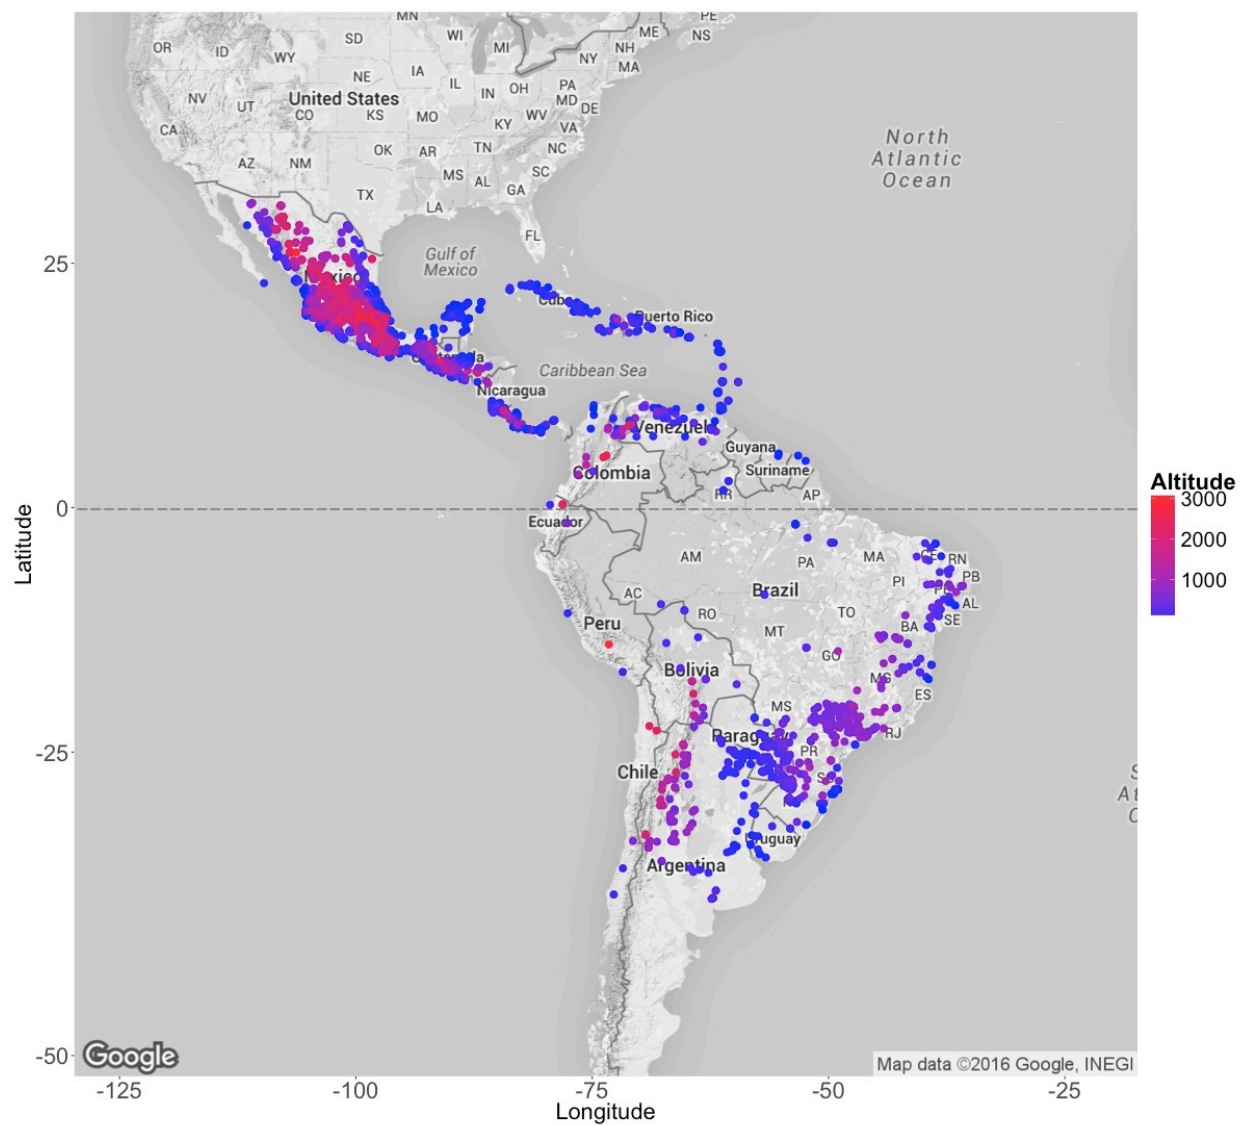

Figure 2. Geographic coordinates of original sampling sites of landrace accessions. Color gradient corresponds to altitude

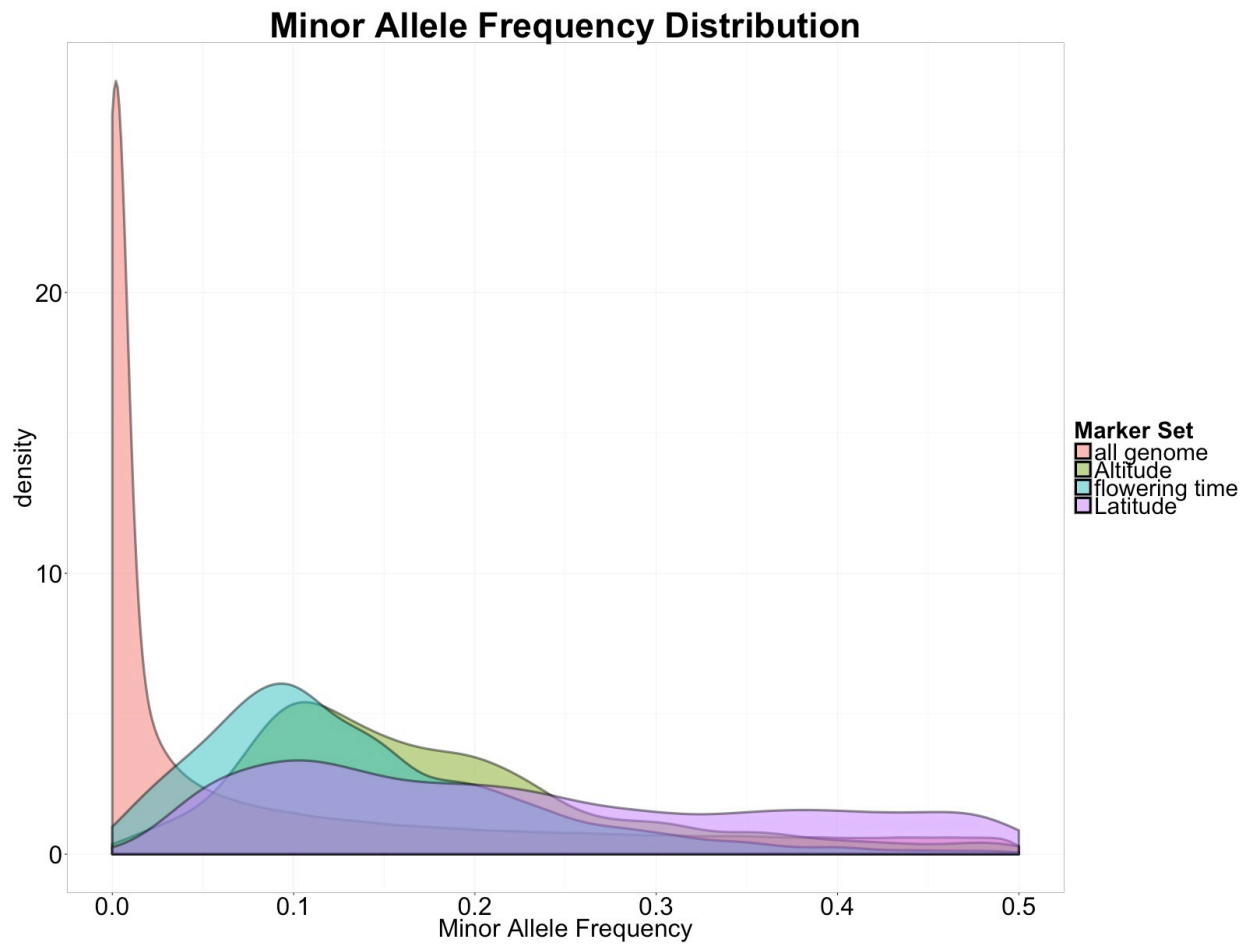

Figure 3. Minor Allele frequency distribution for all segregating SNPs, as well as the most significant SNPs for each trait.



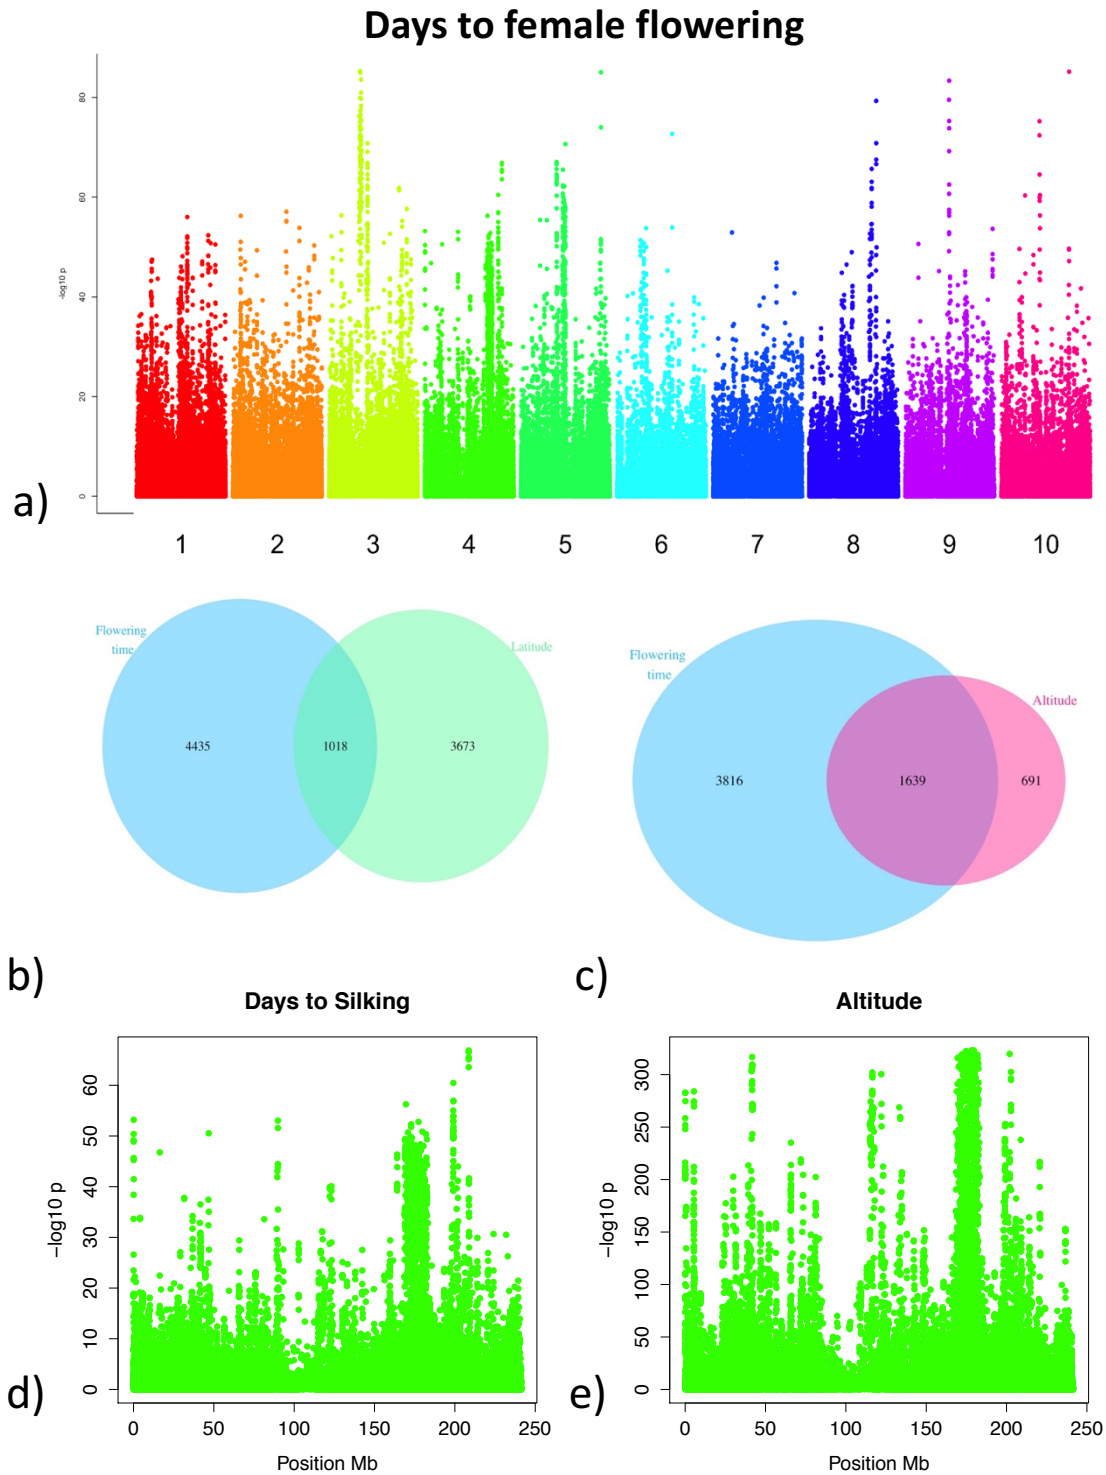

Figure 4. a) Manhattan plot for Days to silking. b) Local Manhattan plot for chromosome 4 for days to silking and c) Altitude. The large region with significance corresponds to INV4m, the

adaptive introgression from highland teosinte to highland maize d) Overlap between significant SNPs for flowering time and latidue and e) altitude

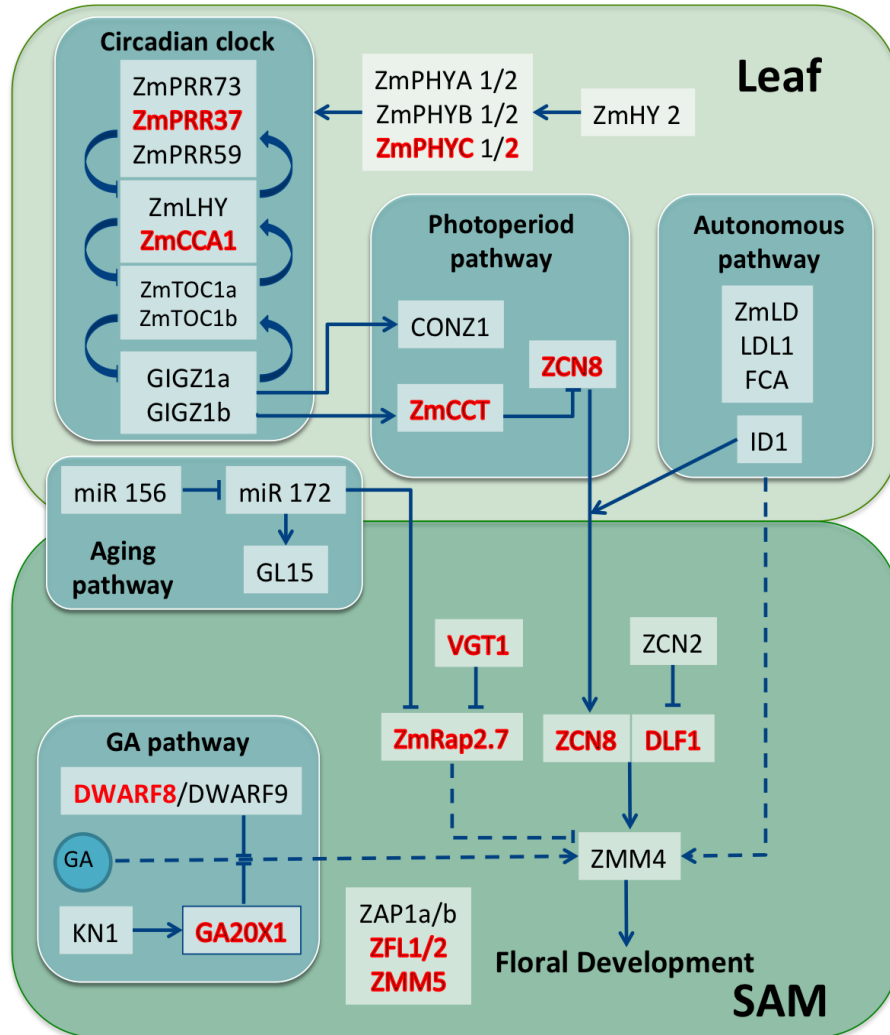

Figure 5. Flowering time pathway from Dong, *et al*<sup>34</sup>, showing the genes involved in flowering time at the leaf and Shoot Apical Meristem (SAM). The genes highlighted in red displayed significant association with flowering time in our study.

## Supplemental Figures

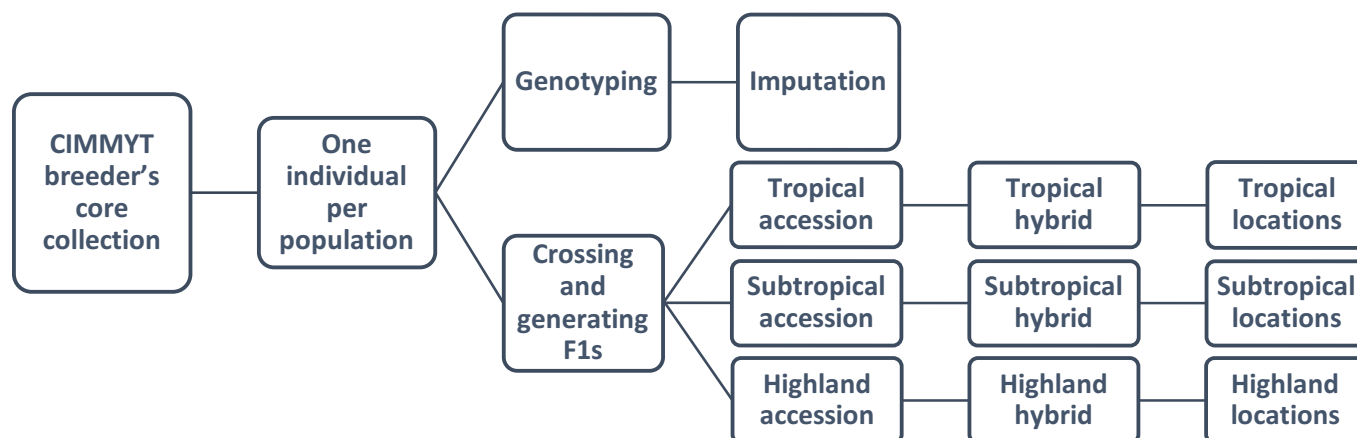

Supplemental figure 1. FOAM design with crossing and evaluation nested within adaptation.

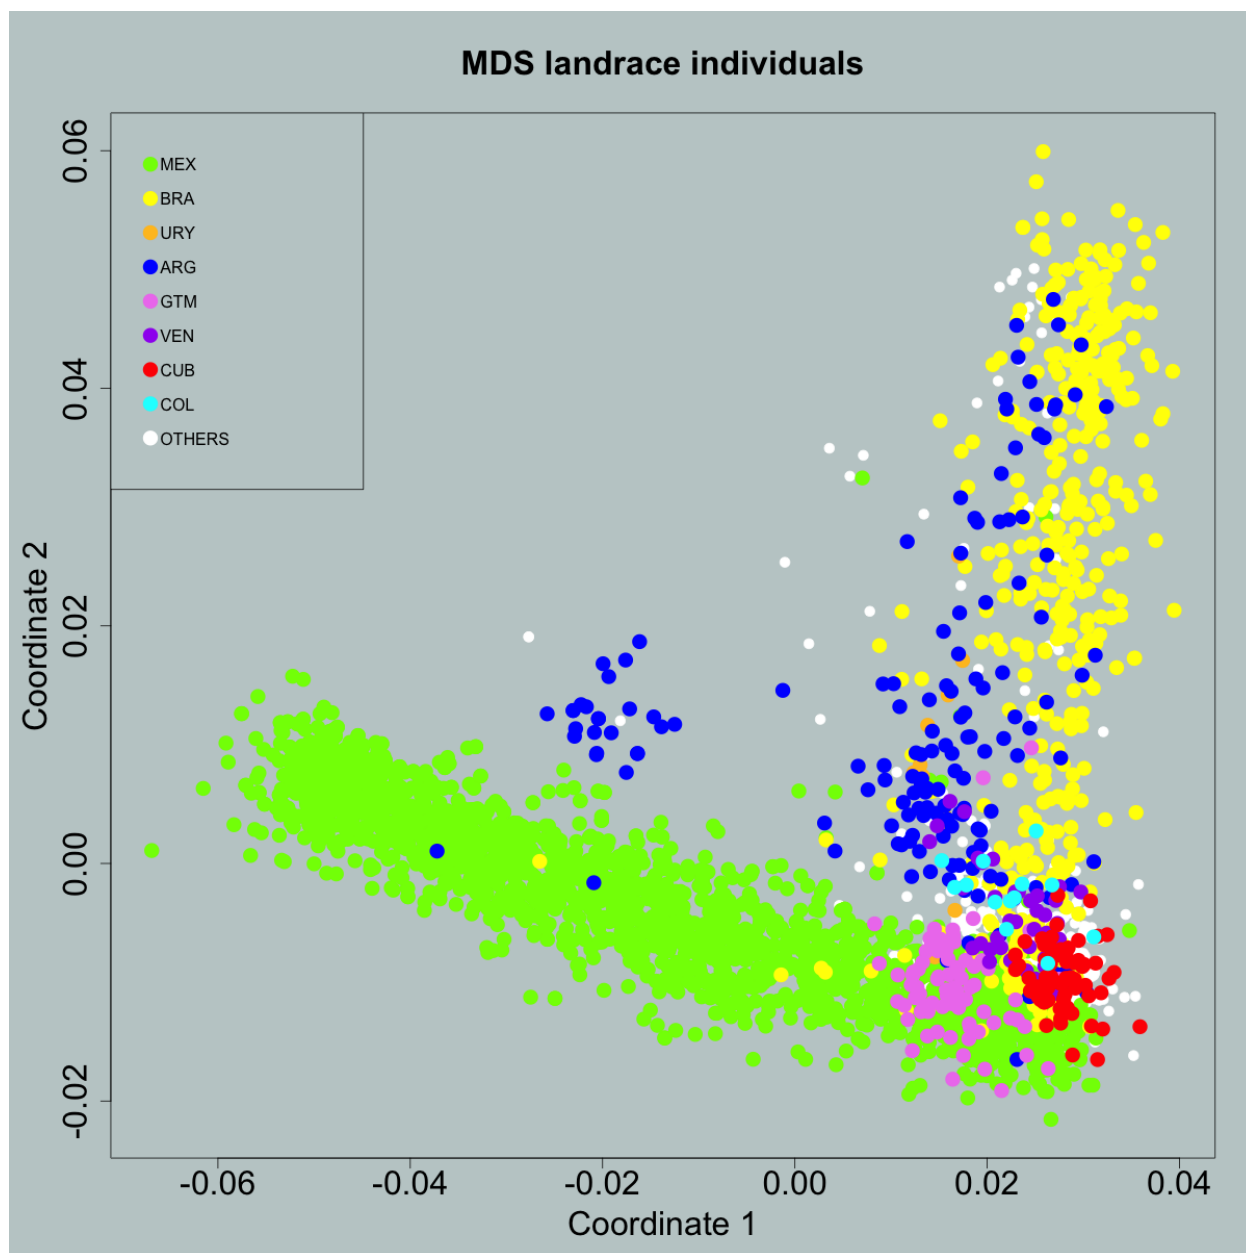

Supplemental figure 2. First 2 Principal Coordinates from Multidimensional scaling of the genetic distance among accessions

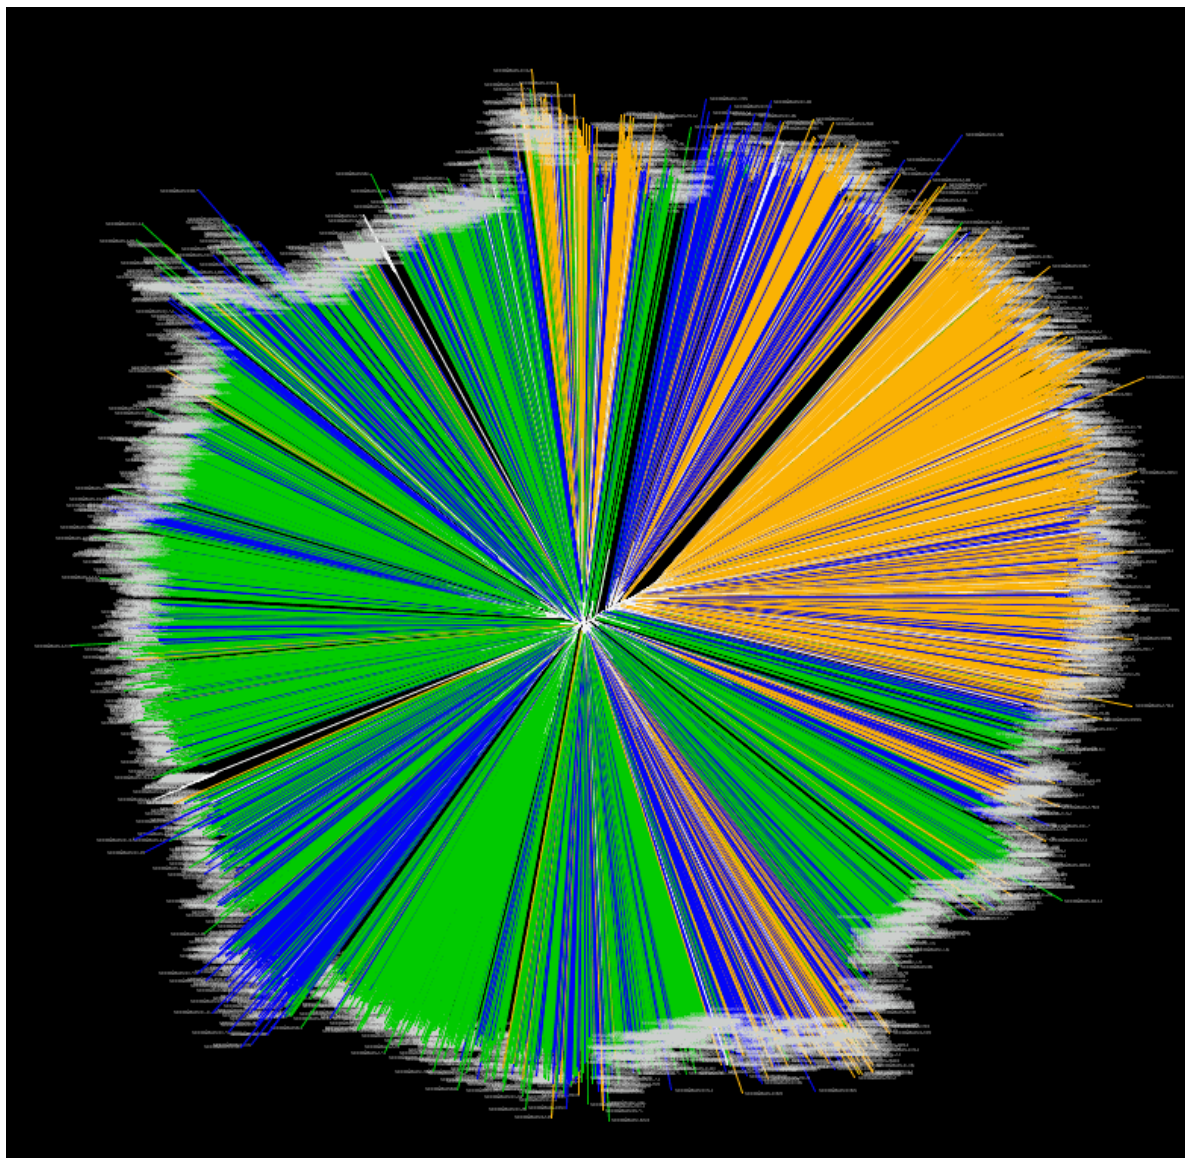

Supplemental figure 3. Neighbor-joining tree. Adaptation classes are colored green for low elevation, blue for mid elevation and orange for high elevation

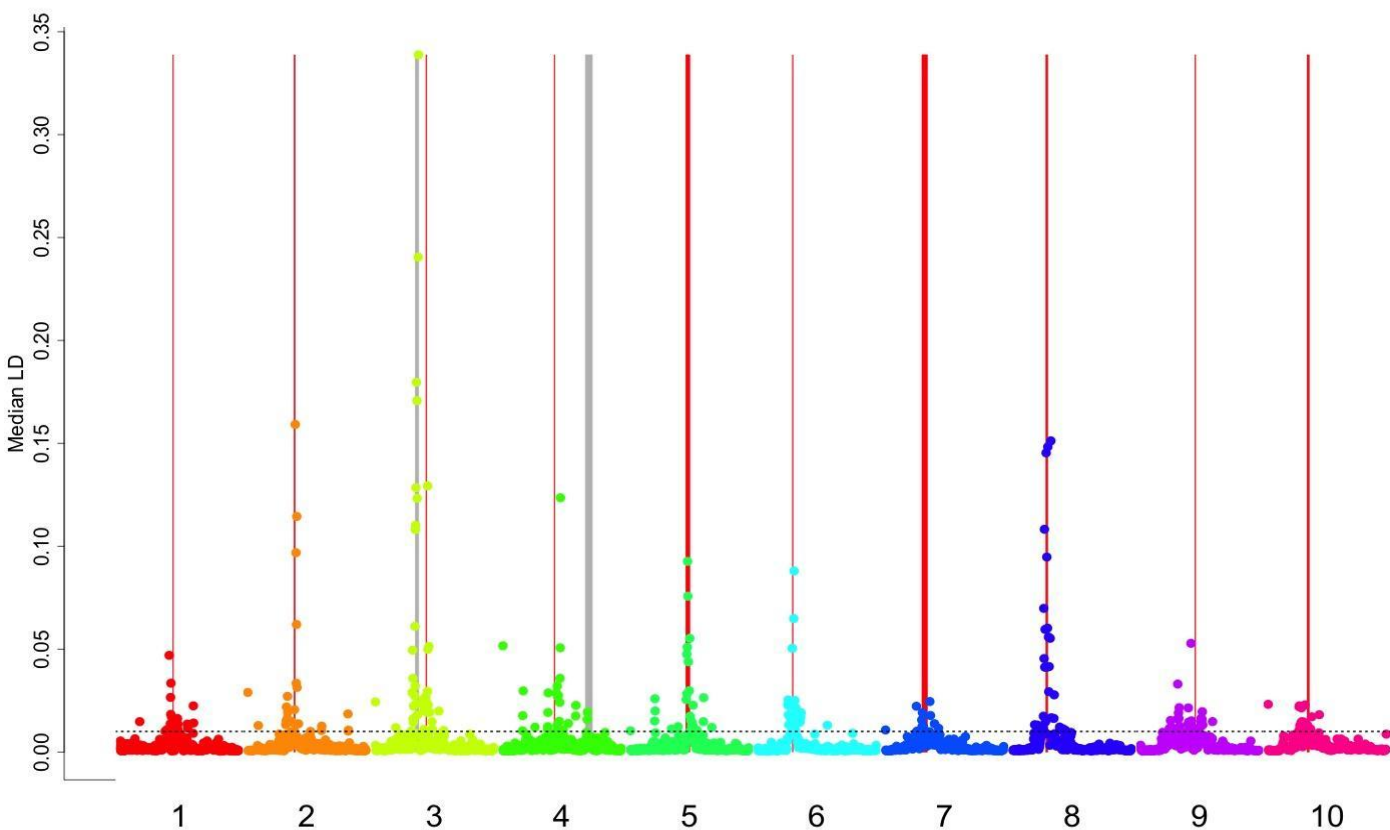

Supplemental figure 4 Genome wide view of the LD empirical threshold. Red shaded areas represent the centromeres, gray shaded areas represent inversions on chromosomes 3 and 4, and the dashed horizontal line represents the empirical LD threshold

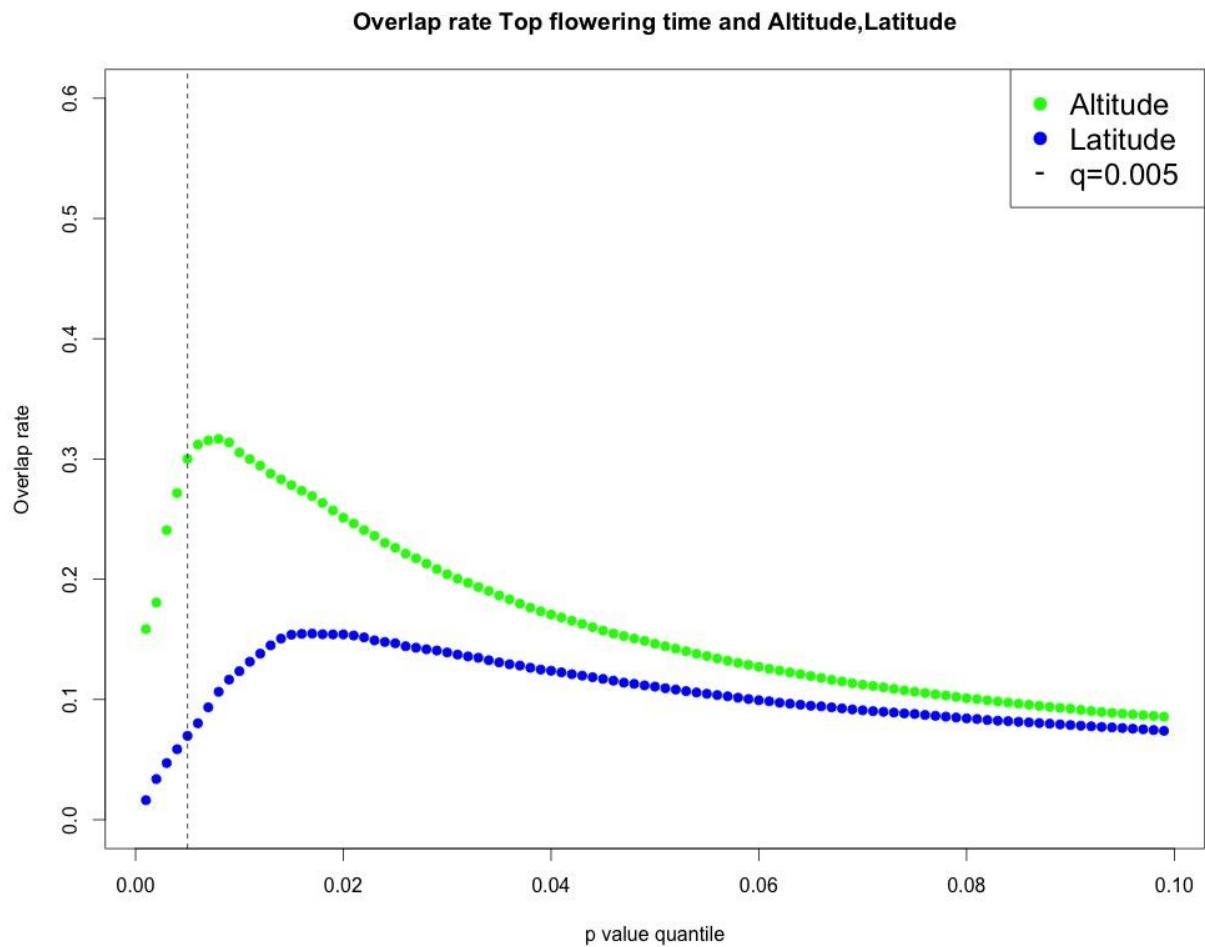

Supplemental figure 5 Overlap rate between the top associating SNPs with flowering time and altitude, latitude at various p-value thresholds.



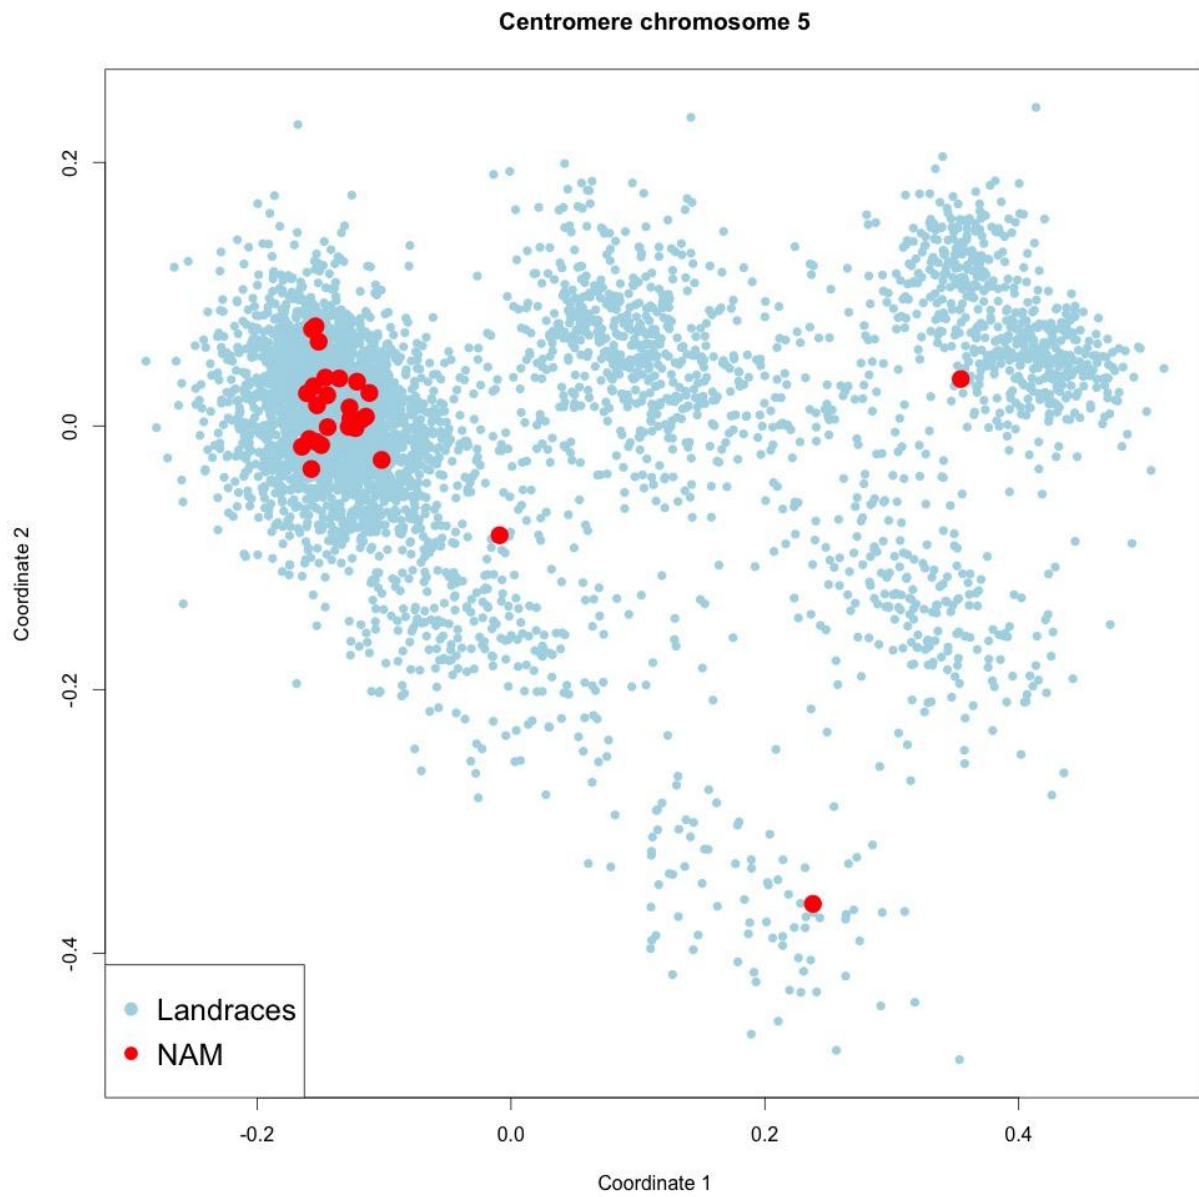

Supplemental figure 6. MDS of centromere of chromosome 5 for the FOAM landrace accessions and the NAM founders: Topright: II14H. Bottom: P39. Middle: CML333



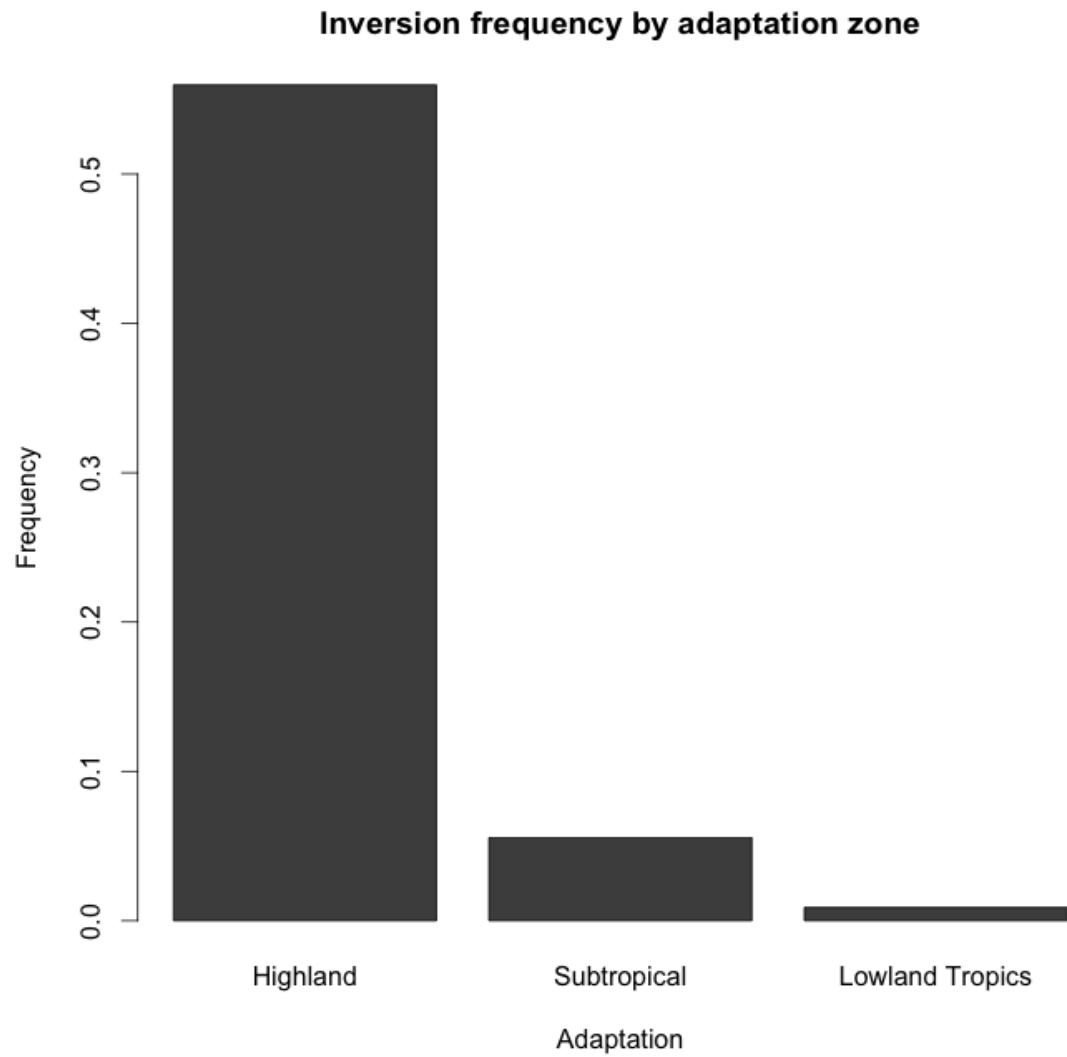

Supplemental figure 7. Frequency of INV4m according to accessions' adaptation class

a)

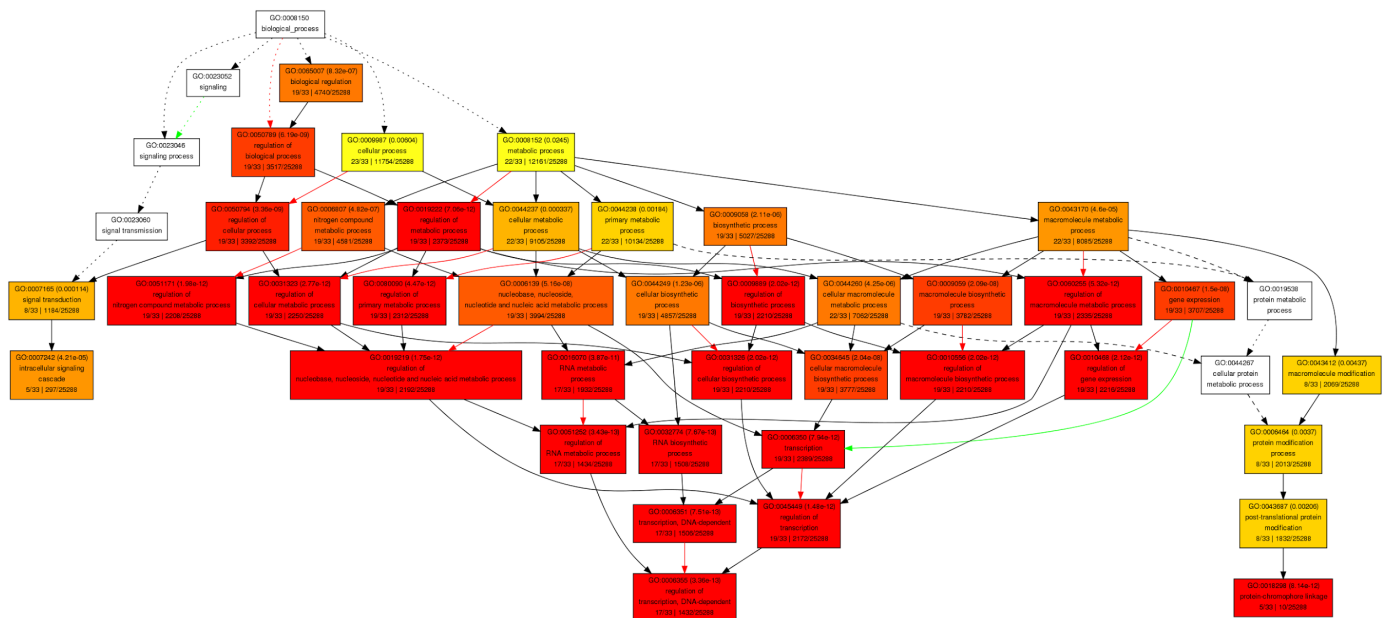

b)

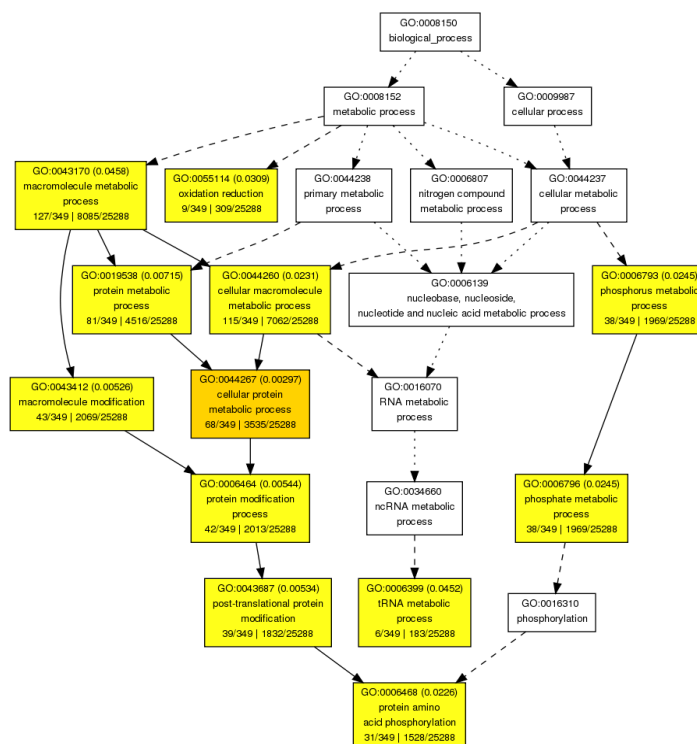

Supplemental figure 8. Ontology of genes for a) regulatory network genes and b) all associating gene

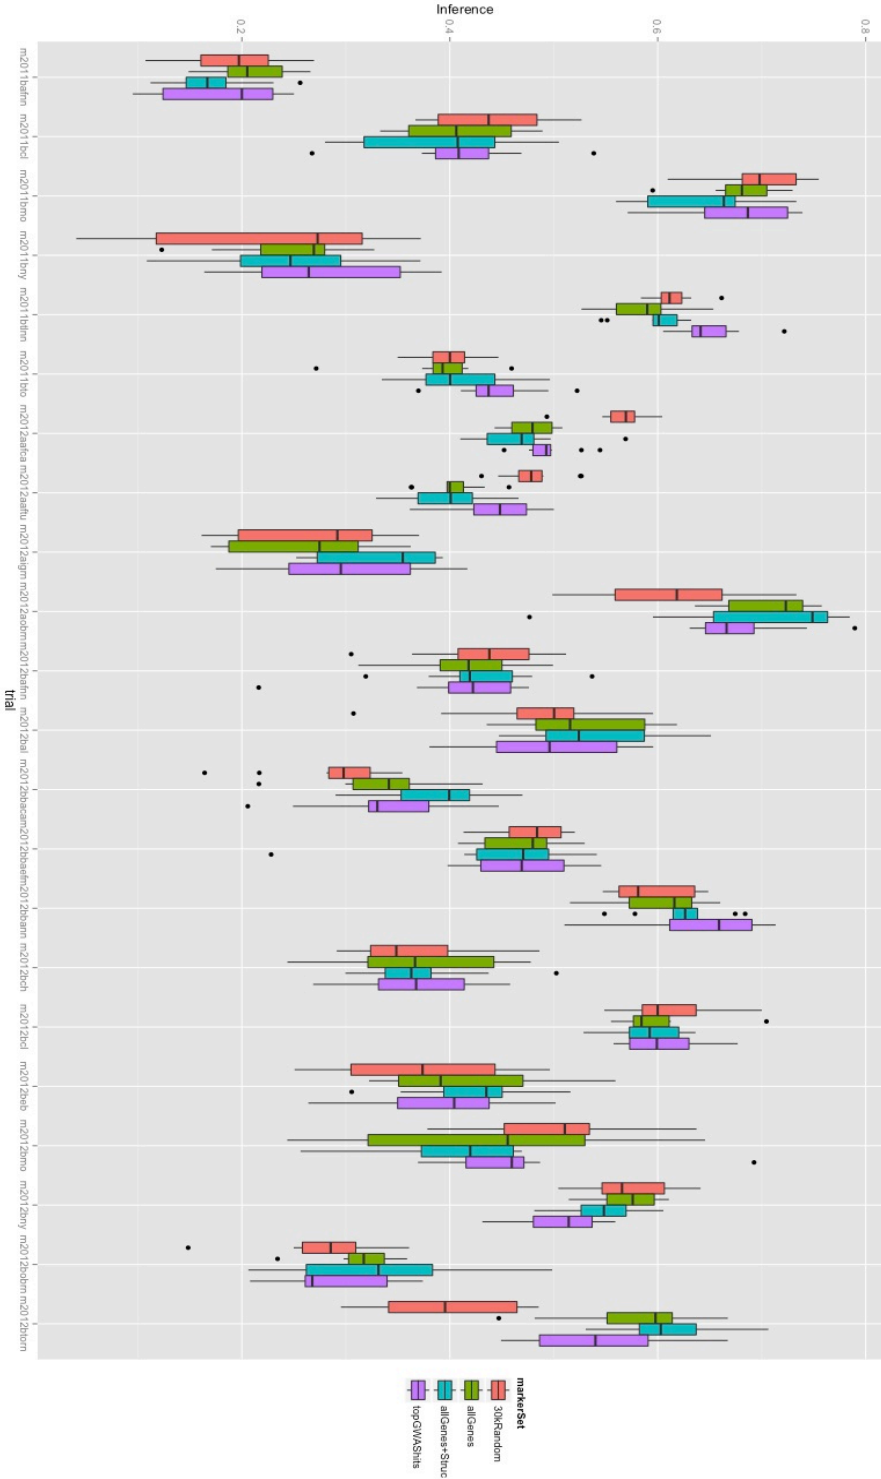

Supplemental figure 9. Genomic Prediction accuracy by trial

| Year/Cycle | TrialCodeName | Location                      | Adaptation  | Accessions |
|------------|---------------|-------------------------------|-------------|------------|
| 2011B      | m2011BAFnn    | Agua Fria, Puebla             | LOWLAND     | 1707       |
| 2011B      | m2011BCL      | Celaya, Guanajuato            | SUBTROPICAL | 783        |
| 2011B      | m2011BMO      | Tarimbaro, Michoacan          | SUBTROPICAL | 481        |
| 2011B      | m2011BNY      | San Pedro Lagunillas, Nayarit | SUBTROPICAL | 551        |
| 2011B      | m2011BTLnn    | Tlaltizapan, Morelos          | SUBTROPICAL | 1140       |
| 2011B      | m2011BTO      | Torreon, Coahuila             | SUBTROPICAL | 1403       |
| 2012A      | m2012AAFca    | Agua Fria, Puebla             | LOWLAND     | 1921       |
| 2012A      | m2012AAFtu    | Agua Fria, Puebla             | LOWLAND     | 1923       |
| 2012A      | m2012AIGrn    | Iguala, Guerrero              | LOWLAND     | 749        |
| 2012A      | m2012AOBrn    | Obregon, Sonora               | LOWLAND     | 452        |
| 2012B      | m2012BAFnn    | Agua Fria, Puebla             | LOWLAND     | 717        |
| 2012B      | m2012BAL      | Amoloya de Juarez, Mexico     | HIGHLAND    | 428        |
| 2012B      | m2012BBAca    | El Batan, Mexico              | HIGHLAND    | 817        |
| 2012B      | m2012BBAef    | El Batan, Mexico              | HIGHLAND    | 759        |
| 2012B      | m2012BBAnn    | El Batan, Mexico              | HIGHLAND    | 817        |
| 2012B      | m2012BCH      | Guadalupe-Victoria, Chiapas   | LOWLAND     | 671        |
| 2012B      | m2012BCL      | Celaya, Guanajuato            | SUBTROPICAL | 805        |
| 2012B      | m2012BEB      | m2012BEB                      | SUBTROPICAL | 658        |
| 2012B      | m2012BMO      | Numaran, Michoacan            | SUBTROPICAL | 282        |
| 2012B      | m2012BNY      | San Pedro Lagunillas, Nayarit | SUBTROPICAL | 805        |
| 2012B      | m2012BOBrn    | Obregon, Sonora               | LOWLAND     | 523        |
| 2012B      | m2012BTOrn    | Torreon, Coahuila             | SUBTROPICAL | 338        |

Supplemental Table 1. Trials location, adaptation class, and number of accessions planted
